# Supplementary material for: An interactive web-based application for Comprehensive Analysis of RNAi-screen Data
Source: Nat Commun. 2016 Feb 23;7:10578. doi: 10.1038/ncomms10578 (PMC5477503; doi:10.1038/ncomms10578)
Supplement: Supplementary Information — Supplementary Figures 1-7, Supplementary Tables 1-7, and Supplementary References [file ncomms10578-s1.pdf]

Welcome to your Project Portal. From here, you can manage ongoing projects and create new ones. Click on a project icon to be redirected to its control panel. Visit [Manage projects](#). and [Help](#) pages for more details.

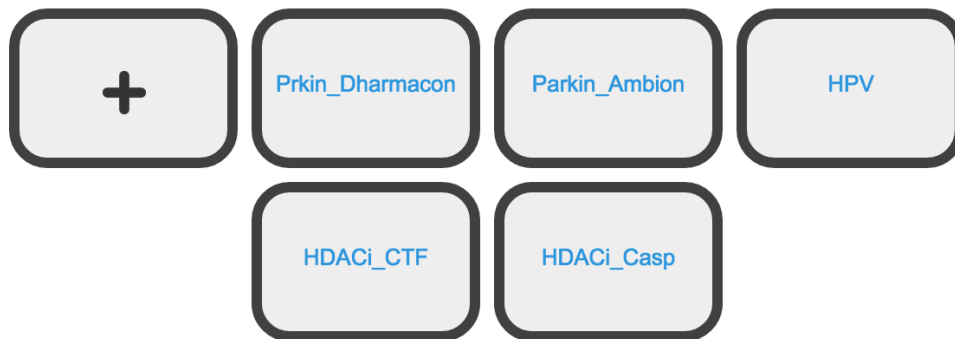

[Save Position](#)

### Supplementary Figure 1

**CARD *Project Portal* page.** Each project is represented by a box in the grid. Details about a project can be obtained by hovering on the corresponding box. The '+' box can be clicked to create new projects.

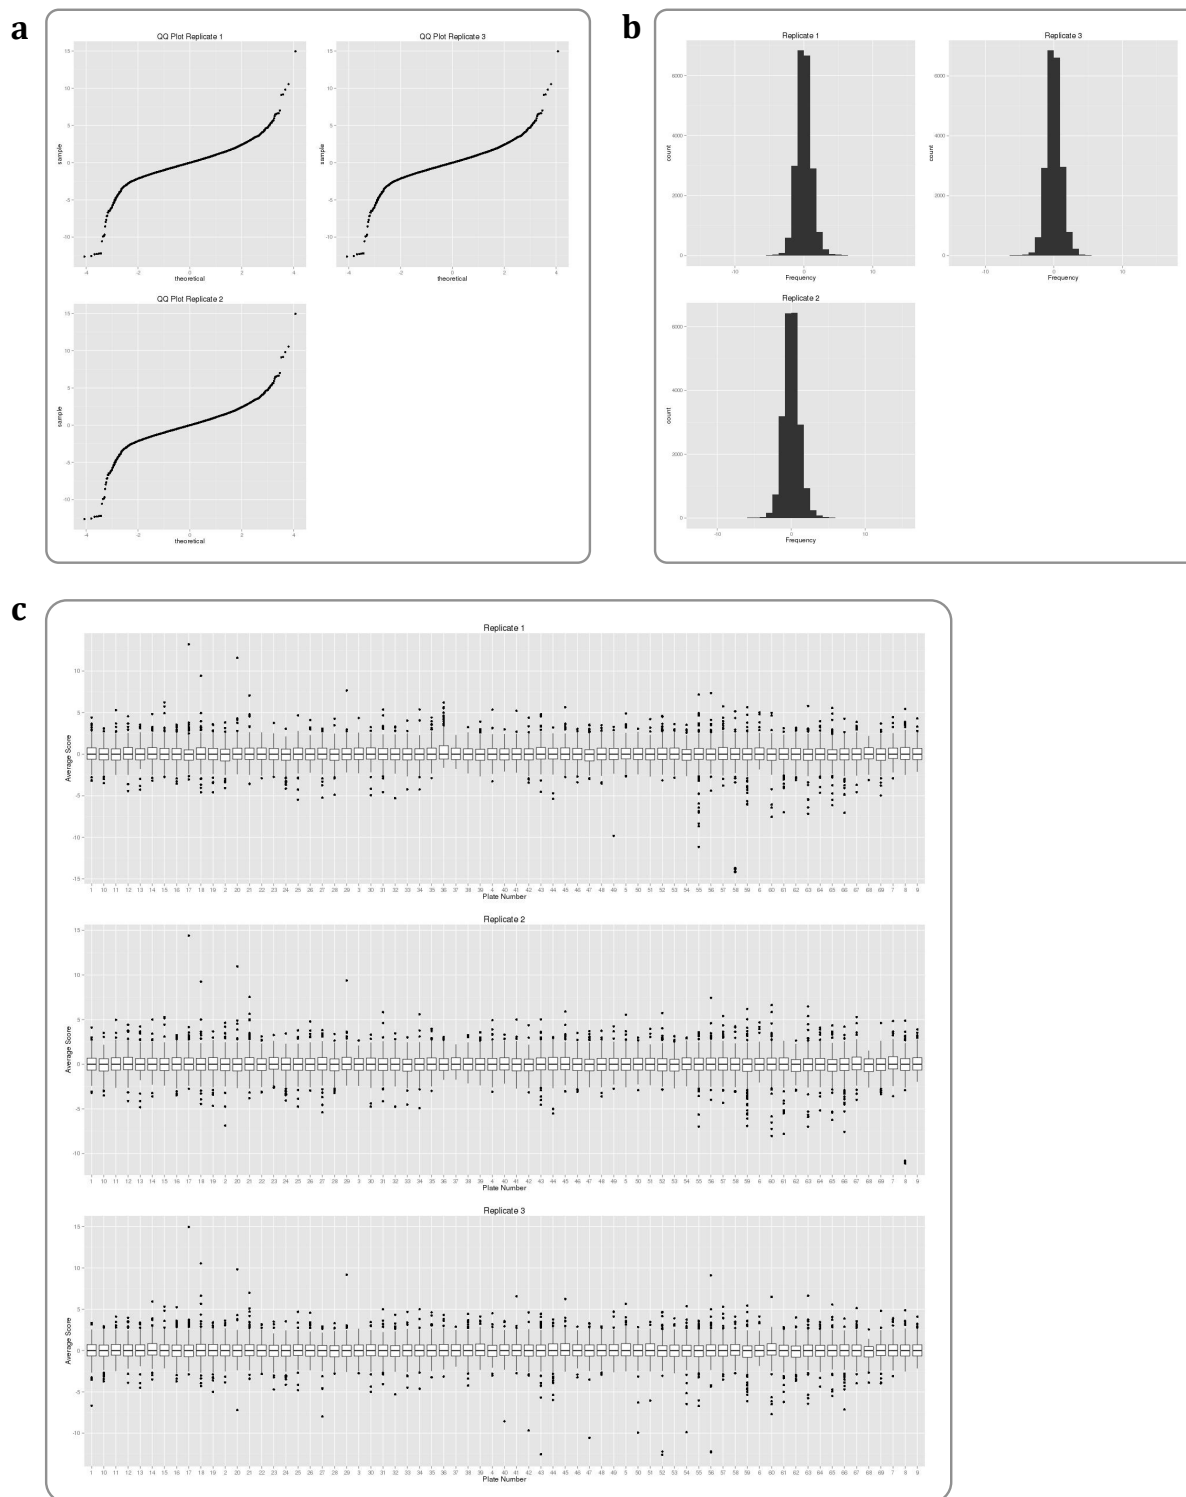

## Supplementary Figure 2

**Enlarged images of CARD screen data.** (a) Quantile-quantile (QQ) plots showing the distribution of screen data with respect to normally distributed data. A straight line implies that the data is normally distributed. (b) Histograms of screen data distribution. (c) Boxplots of the screen data across the plates in a screen.

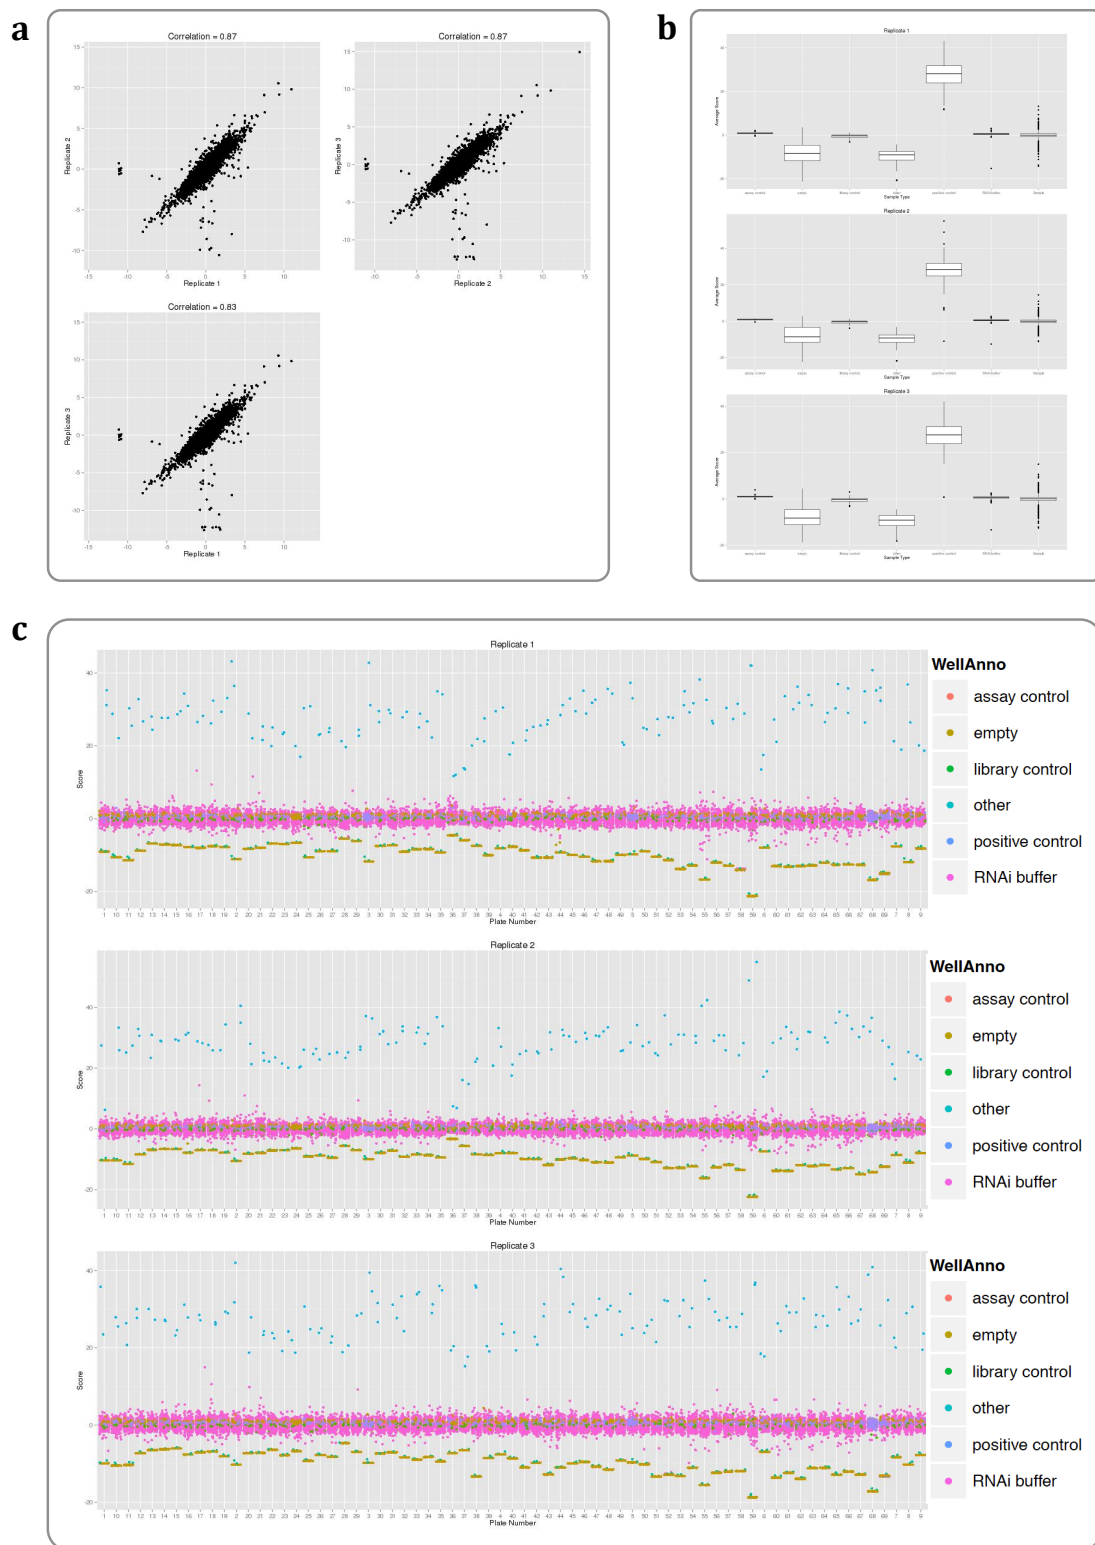

### Supplementary Figure 3

**Enlarged images of CARD screen data.** (a) Pairwise Pearson's correlation of replicate screen scores. (b) Boxplots showing variation of different controls and sample wells pooled from all plates. (c) Jitter-plot of different controls and sample wells across all screen plates.

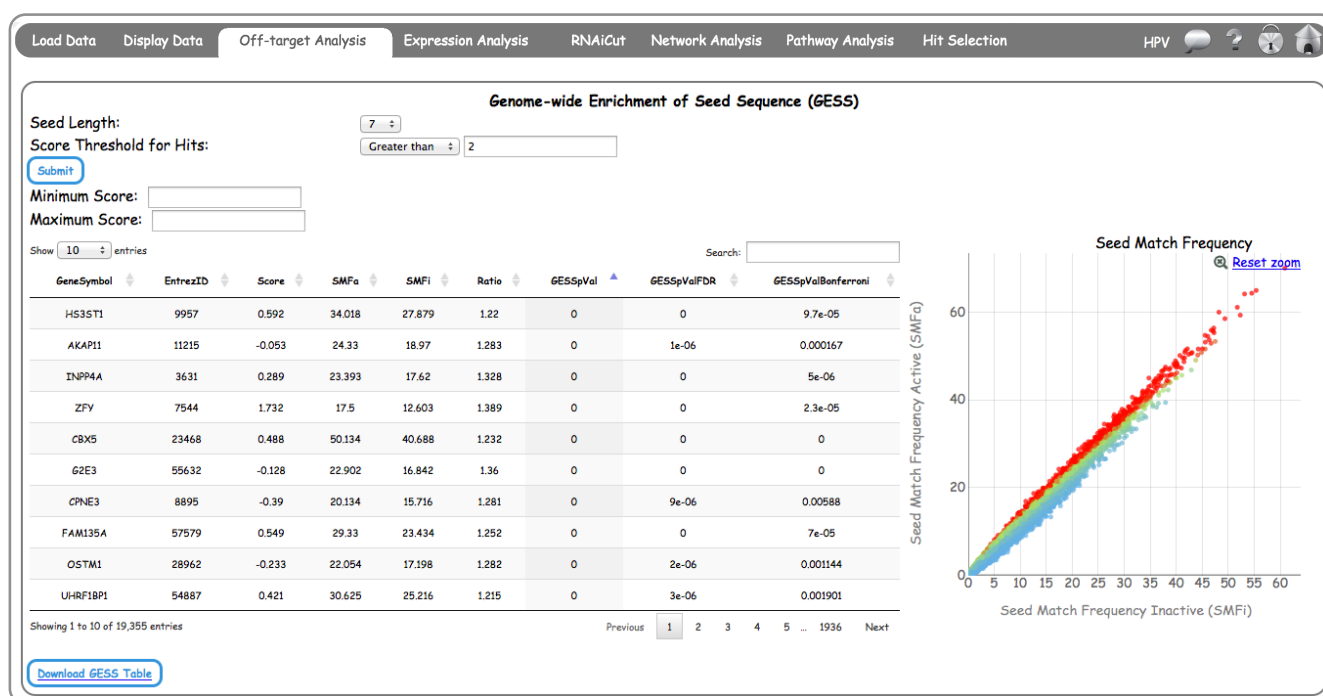

## Supplementary Figure 4

**CARD Off-target Analysis page: Application of the GESS algorithm.** Genome-wide enrichment of seed sequence (GESS) identifies putative genes targeted by enriched siRNA seeds in the screen. The results example from the HPV screen dataset are shown as an interactive table and scatterplot. In the scatterplot, genes are presented as circles with colors corresponding to the FDR corrected GESS p-value. Genes targeted by most significantly enriched seeds are highlighted in red.

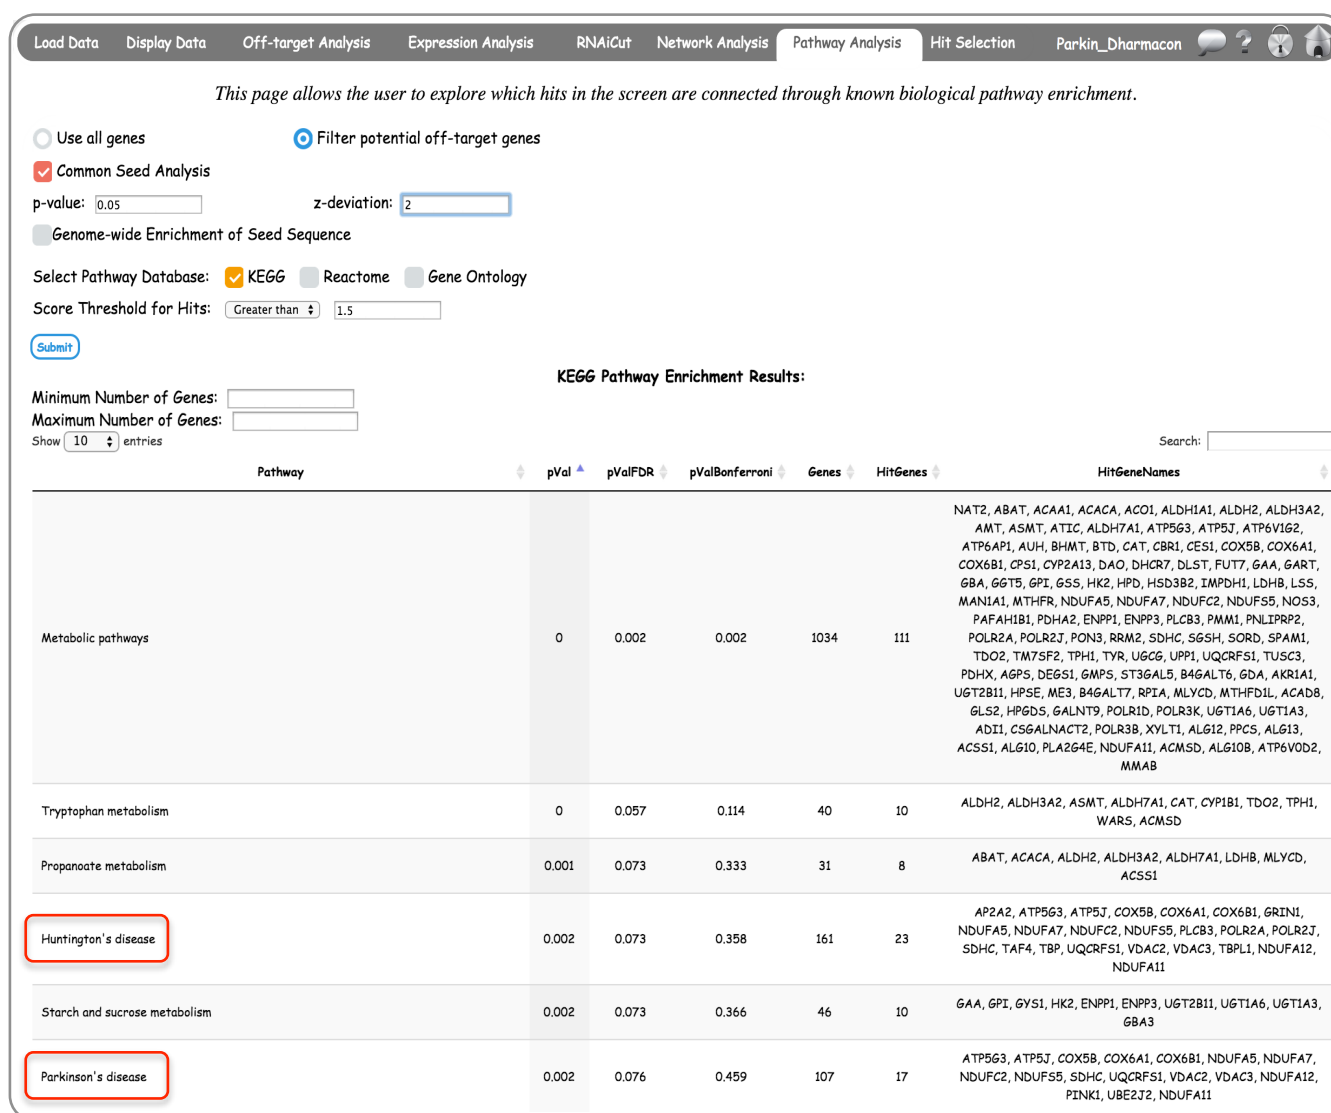

## Supplementary Figure 5

**CARD Pathway Analysis page.** An example of pathway analysis results are shown using the KEGG database with sample data from the Parkin Dharmacon screen (see Methods). The top enriched pathways from the screen hits are related to metabolic processes and also notably to neurological diseases such as Parkinson's and Huntington's disease.

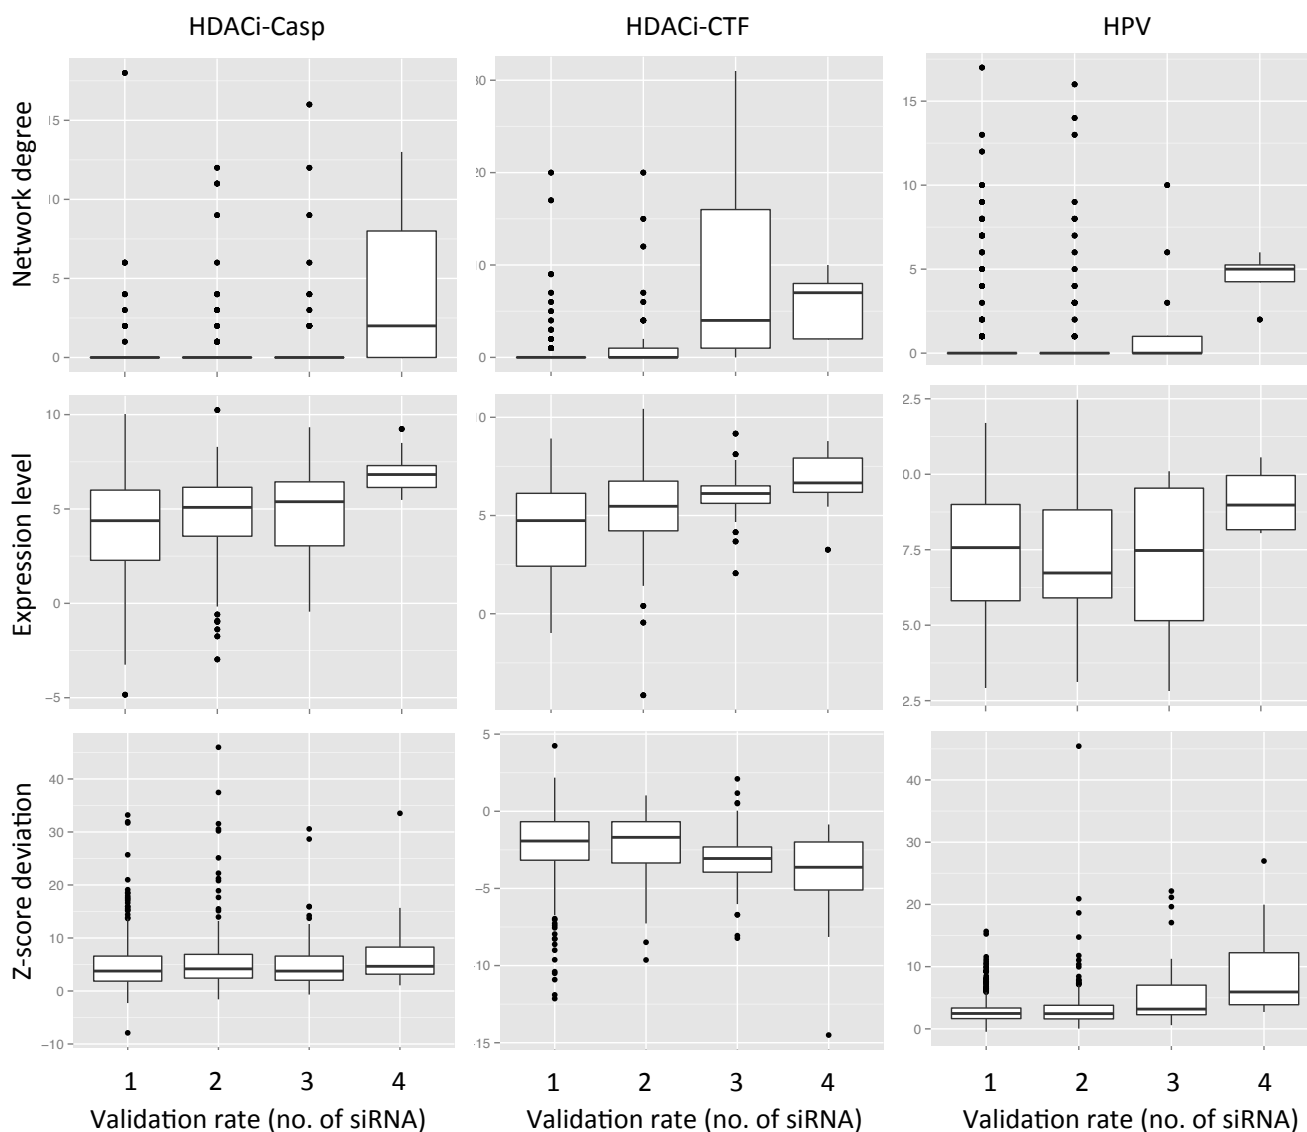

### Supplementary Figure 6

**CARD analysis metrics show enriched values for validated hits.** Different features computed from CARD (Network Degree, Expression Level and Z-score Deviation) are plotted as a function of the number of independent siRNAs (maximum 4) that were validated after deconvolution of the pooled siRNAs in the secondary HDAC inhibitor and HPV screens. Hits not validated by any siRNA are not shown. Genes validated by all 4 siRNAs always show the strongest value for the CARD enrichment metric (note this equates to a lower negative Z-score deviation in the HDACi-CTF screen).

a

Show 10 entries

Search:

| GeneSymbol | Score   | Degree | DegreeFraction | Centrality       | EigenVector | ScreenHit |
|------------|---------|--------|----------------|------------------|-------------|-----------|
| SUMO2      | -1.984  | 74     | 0.061          | 397423194248.914 | 1           | No        |
| ESR1       | -1.9225 | 62     | 0.076          | 713316104393.376 | 0.838       | No        |
| CSNK1A1    | -2.5545 | 53     | 0.21           | 707156277166.875 | 0.716       | Yes       |
| UBL4A      | -3.099  | 53     | 0.203          | 700426998832.239 | 0.716       | Yes       |
| RPS3       | -3.576  | 52     | 0.268          | 1220548199126.92 | 0.703       | Yes       |
| RPS4X      | -4.687  | 47     | 0.272          | 1155378467528.89 | 0.635       | Yes       |
| RPS6       | -3.656  | 47     | 0.261          | 1116596530986.26 | 0.635       | Yes       |
| RPS16      | -2.501  | 46     | 0.299          | 1111146739787.63 | 0.622       | Yes       |
| RPS3A      | -3.666  | 46     | 0.26           | 1063739957304.05 | 0.622       | Yes       |
| RPS13      | -4.736  | 45     | 0.298          | 1011495581299.36 | 0.608       | Yes       |

Showing 1 to 10 of 294 entries

Previous 1 2 3 4 5 ... 30 Next

b

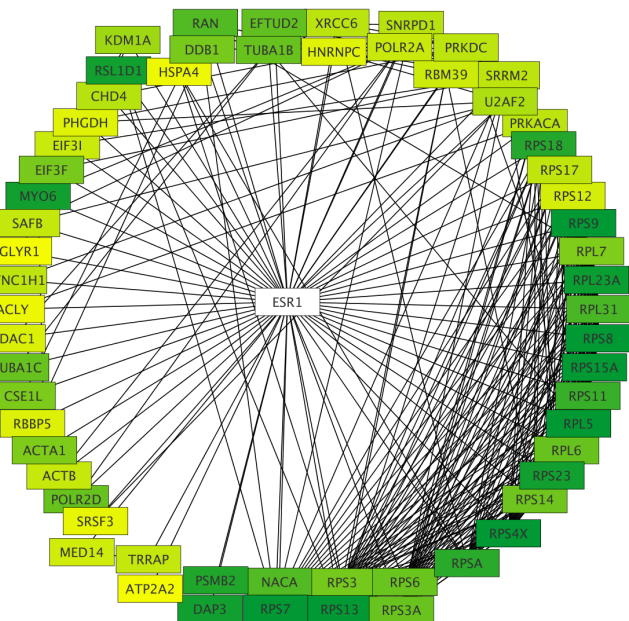

## Supplementary Figure 7

**Analysis of shRNA screen data in CARD.** Pooled shRNA screen coupled with next generation sequencing data (obtained from Project Achilles) from the MCF7 cell line was analyzed using CARD. The network analysis was carried out with both hit and non-hit genes (Supplementary Methods). As the MCF7 cell line is classified as a ER+ breast cancer subtype, the ESR1 gene plays an important role. (a) Although the score of the *ESR1* gene was below threshold for hit selection (ranked 1103 out of 11939 genes screened), the CARD network analysis shows it has the second largest Eigenvector and Degree (highlighted in red). Hence, the *ESR1* gene plays a key role in connecting the hit genes from the screen data. (b) a network module connecting *ESR1* gene with other hit genes from the screen. The network was generated by Cytoscape from Cytoscape compatible input files (.gml) output from CARD.

## Supplementary Table 1

### CARD format file for screen with individual siRNA.

| siRNAID | EntrezID | WellAnno | GeneSymbol | PlateID   | Row | Column | Replicate1 |
|---------|----------|----------|------------|-----------|-----|--------|------------|
| s816    | 1        | Sample   | A1BG       | QDA102104 | 1   | 1      | 0.89       |
| s817    | 1        | Sample   | A1BG       | QDA103282 | 1   | 1      | -1.35      |
| s818    | 1        | Sample   | A1BG       | QDA103382 | 1   | 1      | -2.44      |
| s819    | 2        | Sample   | A2M        | QDA102214 | 1   | 1      | -1.99      |
| s820    | 2        | Sample   | A2M        | QDA102407 | 1   | 1      | 0.42       |
| s821    | 2        | Sample   | A2M        | QDA102483 | 1   | 1      | -0.35      |
| s822    | 9        | Sample   | NAT1       | QDA102407 | 1   | 3      | 0.05       |
| s823    | 9        | Sample   | NAT1       | QDA102483 | 1   | 3      | -0.05      |
| s824    | 9        | Sample   | NAT1       | QDA102214 | 1   | 3      | 0.09       |
| s825    | 10       | Sample   | NAT2       | QDA102407 | 1   | 5      | 0.54       |
| s826    | 10       | Sample   | NAT2       | QDA102483 | 1   | 5      | -2.84      |
| s827    | 10       | Sample   | NAT2       | QDA102214 | 1   | 5      | -0.26      |
| s828    | 12       | Sample   | SERPINA3   | QDA102214 | 1   | 7      | 0.03       |
| s829    | 12       | Sample   | SERPINA3   | QDA102407 | 1   | 7      | -0.02      |
| s830    | 12       | Sample   | SERPINA3   | QDA102483 | 1   | 7      | -1.11      |

Example of required fields in 'CARD format' screen data file for a screen with individual siRNAs (siRNA\_ID field is required). Plate position can be denoted either by 'Well' field with alpha numeric plate position, or by separate 'Row' and 'Column' fields. GeneSymbol is optional as EntrezID is used as the primary gene identifier.

## Supplementary Table 2

**CARD format file for screen with siRNA pools.**

| Plate | Well | WellAnno | GeneSymbol | EntrezID | Replicate1 |
|-------|------|----------|------------|----------|------------|
| 52    | G15  | Sample   | A1BG       | 1        | 0.23       |
| 2     | G19  | Sample   | A2M        | 2        | -0.15      |
| 7     | D19  | Sample   | NAT1       | 9        | 0.98       |
| 14    | N10  | Sample   | NAT2       | 10       | 1.61       |
| 25    | I13  | Sample   | SERPINA3   | 12       | 1.41       |
| 12    | I09  | Sample   | AADAC      | 13       | 1.36       |
| 48    | N06  | Sample   | AAMP       | 14       | 1.05       |
| 15    | C21  | Sample   | AANAT      | 15       | 0.94       |
| 2     | F05  | Sample   | AARS       | 16       | 2.20       |
| 16    | N03  | Sample   | ABAT       | 18       | 1.74       |
| 2     | M04  | Sample   | ABCA1      | 19       | 1.84       |
| 5     | G11  | Sample   | ABCA2      | 20       | 1.76       |
| 11    | B20  | Sample   | ABCA3      | 21       | 1.28       |
| 10    | F11  | Sample   | ABCB7      | 22       | 0.73       |
| 17    | I18  | Sample   | ABCF1      | 23       | 0.18       |
| 5     | G17  | Sample   | ABCA4      | 24       | 0.04       |
| 19    | D16  | Sample   | ABL1       | 25       | -1.30      |
| 27    | H03  | Sample   | ABP1       | 26       | 1.36       |
| 21    | H10  | Sample   | ABL2       | 27       | -0.43      |

Example of required fields in 'CARD format' screen data file for a screen with pooled siRNAs (siRNA\_ID field is not required). Plate position can be denoted either by 'Well' field with alpha numeric plate position, or by separate 'Row' and 'Column' fields. GeneSymbol is optional as EntrezID is used as the primary gene identifier.

### Supplementary Table 3

#### CARD format file for siRNA sequence upload.

| siRNAID | EntrezID | GeneSymbol | Sequence              |
|---------|----------|------------|-----------------------|
| s1043   | 117      | ADCYAP1R1  | UAACGGUUCACCUUCCAGCtt |
| s1044   | 117      | ADCYAP1R1  | ACAAGGAUGACGAUAAUGCca |
| s1045   | 117      | ADCYAP1R1  | UAGUGGAUCCGAAUAGUGgg  |
| s1055   | 123      | ADFP       | UGAGAGGUAGAGCUUAUCctg |
| s1056   | 123      | ADFP       | UACUGUUCUACCAACAGCUct |
| s1057   | 123      | ADFP       | UGCUUAGCUUCUUAACCCtg  |

Example of required fields in 'CARD format' siRNA sequence data file. Note that CARD will take only the first 19 nucleotides of siRNA sequence, so data files that include two base overhangs at the end of the siRNA sequence (as shown in the 'Sequence' column) are acceptable for upload. Either 'sense' or 'antisense' sequence can be used, but the user must check the appropriate radio button to choose one or the other on the CARD *Off-target Analysis* page.

### Supplementary Table 4

#### CARD format file for mRNA expression data upload.

| EntrezID | Gene     | Value       | ABS_CALL |
|----------|----------|-------------|----------|
| 16728    | L1cam    | 6.949941072 | Present  |
| 13798    | En1      | 6.882419292 | Absent   |
| 235281   | Scn3b    | 6.730827413 | Absent   |
| 11513    | Adcy7    | 9.094310768 | Present  |
| 80879    | Slc16a3  | 6.97746998  | Present  |
| 242773   | Slc45a1  | 6.813702963 | Absent   |
| 258502   | Olfir279 | 6.761853037 | Absent   |
| 20737    | Spn      | 7.058786204 | Present  |
| 52915    | Zmiz2    | 9.042783851 | Present  |
| 66313    | Smurf2   | 7.455488333 | Present  |
| 237831   | Slc13a5  | 6.892523388 | Absent   |

Example of required fields in an mRNA expression data file. The file must contain columns with headers EntrezID and Value (expression levels). The file may also contain Present/Absent calls (ABS\_CALL) and/or detection p-values (DetectionPval). If multiple replicates are present, columns containing expression levels should have headers with Value appended by the replicate number.

## Supplementary Table 5

CARD parameters used in analysis of HDACi and HPV siRNA screens.

| Screen Name                 | Property          | Value   |
|-----------------------------|-------------------|---------|
| HDACi-Casp primary screen   | Z-score*          | > 5.13  |
|                             | Network degree    | > 0     |
|                             | Expression level  | > 3     |
|                             | CSA p-value       | > 0.05  |
|                             | Z-score deviation | > 5.13  |
| HDACi-CTF primary screen    | Z-score*          | < -2.91 |
|                             | Network degree    | > 0     |
|                             | Expression level  | > 3     |
|                             | CSA p-value       | > 0.05  |
|                             | Z-score deviation | < -2.91 |
| HPV primary screen          | Z-score*          | > 2     |
|                             | Network degree    | > 0     |
|                             | Expression level  | > 5     |
|                             | CSA p-value       | > 0.05  |
|                             | Z-score deviation | > 2     |
| HDACi-Casp secondary screen | Z-score*          | > 2.2   |
| HDACi-CTF secondary screen  | Z-score*          | < 0.6   |
| HPV secondary screen        | Z-score*          | > 2     |

The list of properties and their corresponding cutoffs used for hit-selection in CARD. Asterisks indicate the z-score cutoffs used in the original studies.

## Supplementary Table 6

The list of parameters used for analyzing the Parkin screen datasets in CARD.

| Property                               | Parkin-Dharmacon   | Parkin-Ambion      |
|----------------------------------------|--------------------|--------------------|
| Z-score                                | > 2                | > 1.5              |
| Expression status                      | Present or Missing | Present or Missing |
| CSA p-value                            | > 0.05             | > 0.05             |
| Z-score deviation                      | > 2                | > 1.5              |
| Minimum number of siRNAs               | Not applicable     | >=2                |
| Network Degree                         | > 0                | > 0                |
| Non-hit threshold for network analysis | > 1                | > 0.75             |

## Supplementary Table 7

### Identification of likely screen hits in CARD through Network Analysis.

| Gene   | Reference                                                                                                                                                                                                                                                                      |
|--------|--------------------------------------------------------------------------------------------------------------------------------------------------------------------------------------------------------------------------------------------------------------------------------|
| CTNNB1 | Identification of Pivotal Cellular Factors Involved in HPV-Induced Dysplastic and Neoplastic Cervical Pathologies <sup>2</sup> .                                                                                                                                               |
| TRRAP  | SMCX and components of the TIP60 complex contribute to E2 regulation of the HPV E6/E7 promoter <sup>3</sup> .                                                                                                                                                                  |
| KAT5   | Destabilization of TIP60 by human papillomavirus E6 results in attenuation of TIP60-dependent transcriptional regulation and apoptotic pathway <sup>4</sup> .<br>SMCX and components of the TIP60 complex contribute to E2 regulation of the HPV E6/E7 promoter <sup>3</sup> . |
| CREBBP | The human papillomavirus type 16 E6 oncoprotein can down-regulate p53 activity by targeting the transcriptional coactivator CBP/p300 <sup>5</sup> .<br>CBP/p300 in cell growth, transformation, and development <sup>6</sup> .                                                 |
| PCNA   | Increased expression of cellular RNA-binding proteins in HPV-induced neoplasia and cervical cancer <sup>7</sup> .<br>Expression of PCNA is associated with the presence of HPV DNA in skin warts <sup>8</sup> .                                                                |

The list of genes with moderate scores in the HPV screen ( $>1.5$  and  $< 2$ ), found to be most connected ( $\geq 7$  connections) with screen hits (defined by screen score  $>2$ ) using Network Analysis in Supplementary Fig. 12. All of the genes are found to be linked with HPV-associated disease based on existing literature.

## Supplementary References

- 1 Cowley, G. S. *et al.* Parallel genome-scale loss of function screens in 216 cancer cell lines for the identification of context-specific genetic dependencies. *Scientific Data* **1**, 140035, doi:10.1038/sdata.2014.35 (2014).
- 2 Mattarocci, S. *et al.* Identification of pivotal cellular factors involved in HPV-induced dysplastic and neoplastic cervical pathologies. *Journal of cellular physiology* **229**, 463-470, doi:10.1002/jcp.24465 (2014).
- 3 Smith, J. A. *et al.* SMCX and components of the TIP60 complex contribute to E2 regulation of the HPV E6/E7 promoter. *Virology* **468-470**, 311-321, doi:10.1016/j.virol.2014.08.022 (2014).
- 4 Jha, S. *et al.* Destabilization of TIP60 by human papillomavirus E6 results in attenuation of TIP60-dependent transcriptional regulation and apoptotic pathway. *Molecular cell* **38**, 700-711, doi:10.1016/j.molcel.2010.05.020 (2010).
- 5 Zimmermann, H., Degenkolbe, R., Bernard, H. U. & O'Connor, M. J. The human papillomavirus type 16 E6 oncoprotein can down-regulate p53 activity by targeting the transcriptional coactivator CBP/p300. *J Virol* **73**, 6209-6219 (1999).
- 6 Goodman, R. H. & Smolik, S. CBP/p300 in cell growth, transformation, and development. *Genes & development* **14**, 1553-1577 (2000).
- 7 Fay, J., Kelehan, P., Lambkin, H. & Schwartz, S. Increased expression of cellular RNA-binding proteins in HPV-induced neoplasia and cervical cancer. *Journal of medical virology* **81**, 897-907, doi:10.1002/jmv.21406 (2009).
- 8 Lu, S., Syrjanen, K., Havu, V. K. & Syrjanen, S. Expression of PCNA is associated with the presence of HPV DNA in skin warts. *Archives of dermatological research* **289**, 35-39 (1996).
